# Supplementary material
Source: PubMed Central journal article supplement (PMC7170486)
Supplement: AEM.02908-19-s0001.pdf [file AEM.02908-19-s0001.pdf]

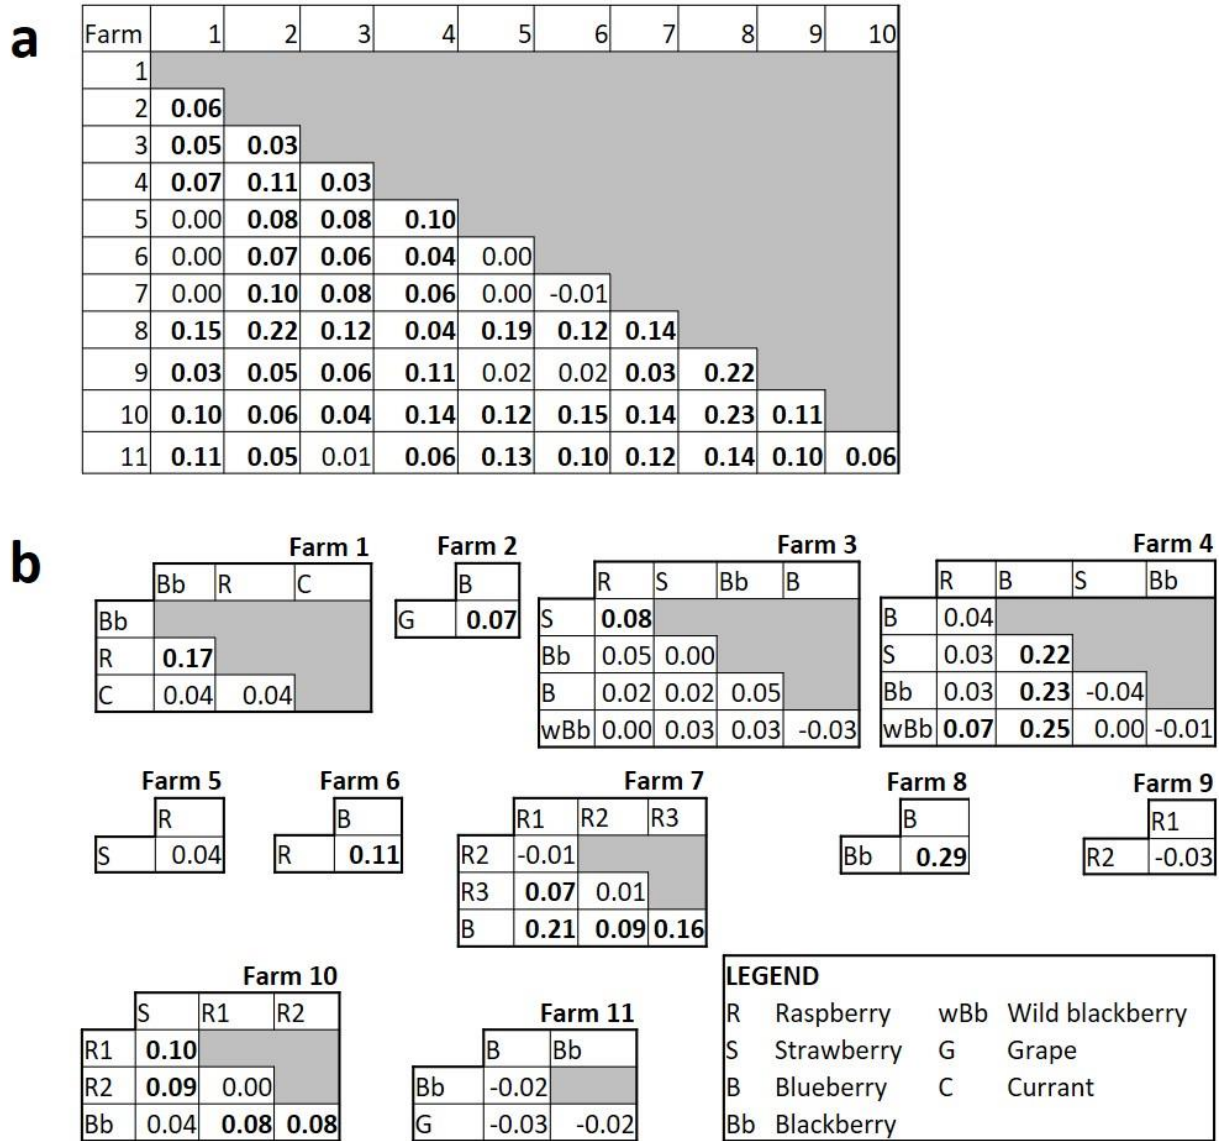

**Fig. S1.** Pairwise Slatkin's  $R_{st}$  among: **a** – 11 sampled farms of small fruit in the Pacific Northwest; **b** – among fields in each of 11 farm. Numbers in bold – significant  $R_{st}$  ( $P < 0.05$ ). Significance tested at 999 permutations.
